# Supplementary material for: Hepatic de novo lipogenesis is suppressed and fat oxidation is increased by omega-3 fatty acids at the expense of glucose metabolism
Source: PubMed Central journal article supplement (PMC7078804; doi:10.1136/bmjdrc-2019-000871), 2020-03-17

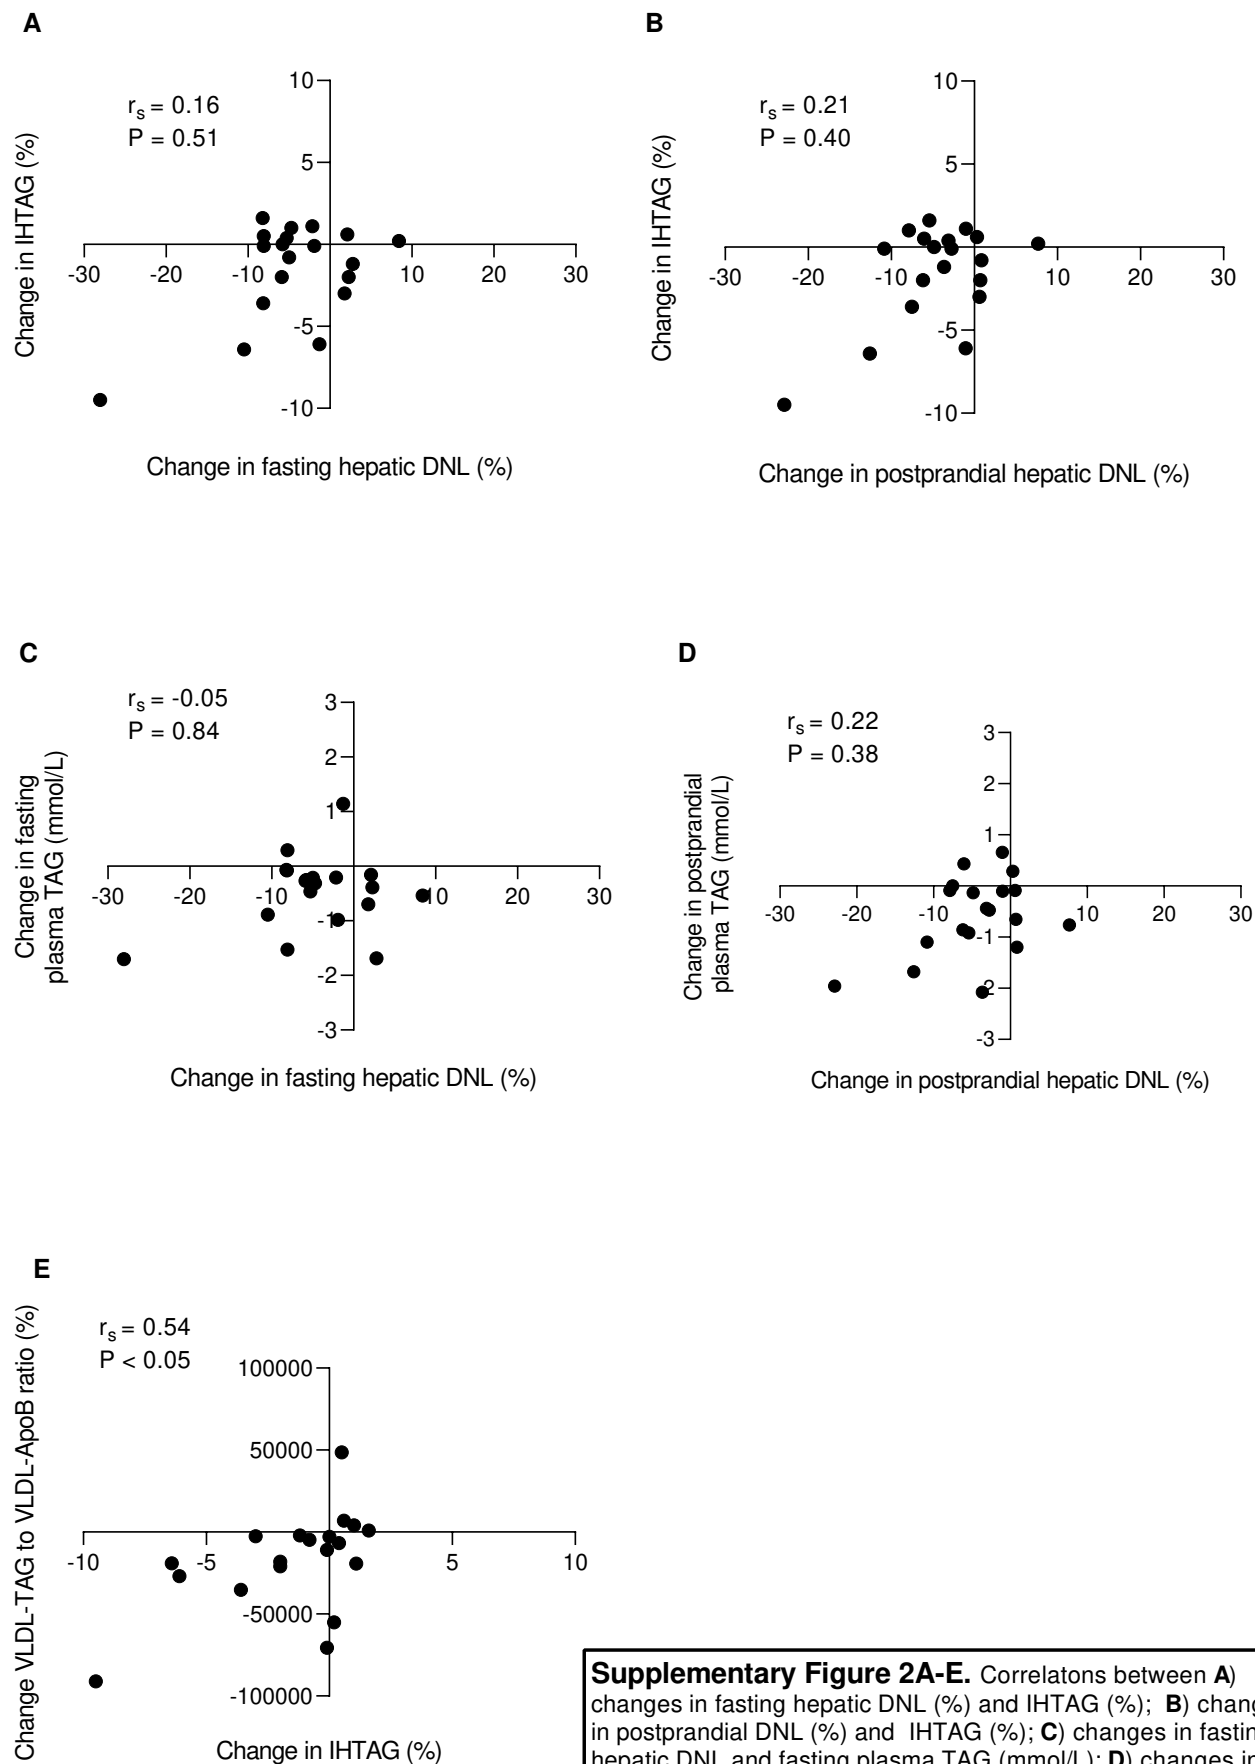

Supplement: bmjdrc-2019-000871supp002.pdf [file bmjdrc-2019-000871supp002.pdf]
