# Supplementary material for: Hepatic de novo lipogenesis is suppressed and fat oxidation is increased by omega-3 fatty acids at the expense of glucose metabolism
Source: PubMed Central journal article supplement (PMC7078804; doi:10.1136/bmjdrc-2019-000871), 2020-03-17
Supplement: bmjdrc-2019-000871supp003.pdf [file bmjdrc-2019-000871supp003.pdf]

Supplementary Table 1. Relative mRNA expression in Huh7 cells.

| Gene          | OPL         | OPL+EPA+DHA   |
|---------------|-------------|---------------|
| <i>SREBF1</i> | 1.04 ± 0.10 | 0.94 ± 0.16   |
| <i>FASN</i>   | 1.02 ± 0.05 | 0.63 ± 0.10*  |
| <i>ACACA</i>  | 1.05 ± 0.12 | 0.75 ± 0.13   |
| <i>DGAT2</i>  | 1.06 ± 0.14 | 0.62 ± 0.08*  |
| <i>SCD</i>    | 1.11 ± 0.22 | 0.49 ± 0.11*  |
| <i>PPARA</i>  | 1.07 ± 0.17 | 0.83 ± 0.17   |
| <i>CPT1A</i>  | 1.06 ± 0.14 | 0.61 ± 0.07** |
| <i>CPT2</i>   | 1.08 ± 0.23 | 0.78 ± 0.18   |

Data expressed as Mean ± SEM. Abbreviations: OPL, oleate, palmitate, linoleate; EPA, eicosapentaenoic acid; DHA, docosahexaenoic acid

\*P<0.05, \*\*P<0.01 OPL vs OPL+EPA+DHA
